# Supplementary material for: Sensitized solar cells with colloidal PbS–CdS core–shell quantum dots
Source: Royal Society of Chemistry journal article supplement (doi:10.1039/c3cp54145b), 2013-11-04
Supplement: c3cp54145b.pdf [file c3cp54145b.pdf]

1 ASSOCIATE CONTENT

2 Supporting Information

3 **Sensitized Solar Cells with Colloidal PbS/CdS Core/Shell**  
4 **Quantum Dots**

5 Lai-Hung Lai,<sup>a</sup> Loredana Protesescu,<sup>b,c</sup> Maksym V. Kovalenko<sup>b,c</sup> and Maria Antonietta Loi<sup>a</sup>

6 <sup>a</sup>Zernike Institute for Advanced Materials, University of Groningen, Nijenborgh 4, Groningen, 9747 AG, The Netherlands

7 <sup>b</sup>Department of Chemistry and Applied Biosciences, ETH Zürich, Wolfgang-Pauli-Str. 10, Zurich, 8093, Switzerland

8 <sup>c</sup>EMPA-Swiss Federal Laboratories for Materials Science and Technology, Überlandstrasse 129, Dübendorf, 8600, Switzerland

9

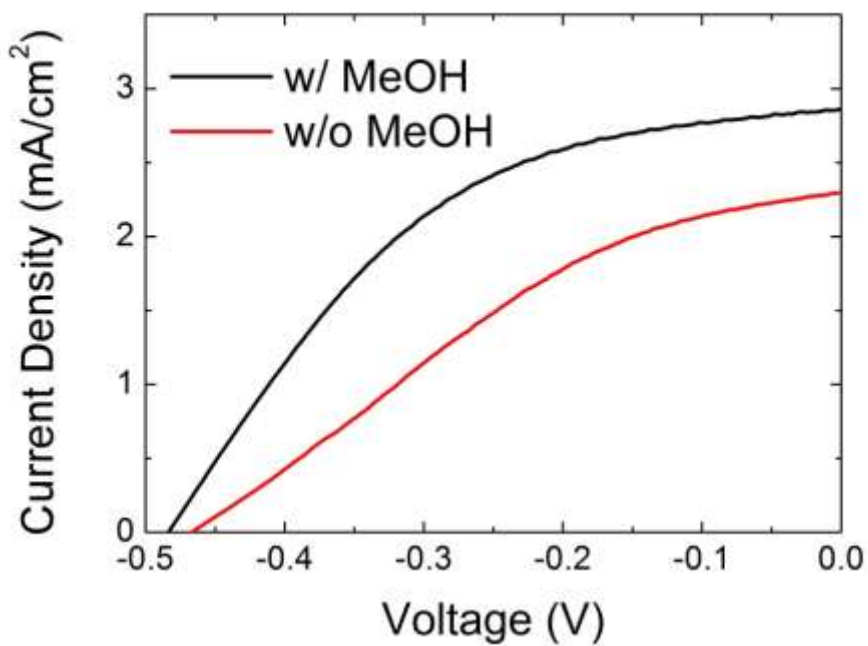

10

11 **Figure S1.** PbS/CdS (1.1 nm) QD sensitized solar cells in the polysulfide  
12 electrolyte with and without methanol.

13

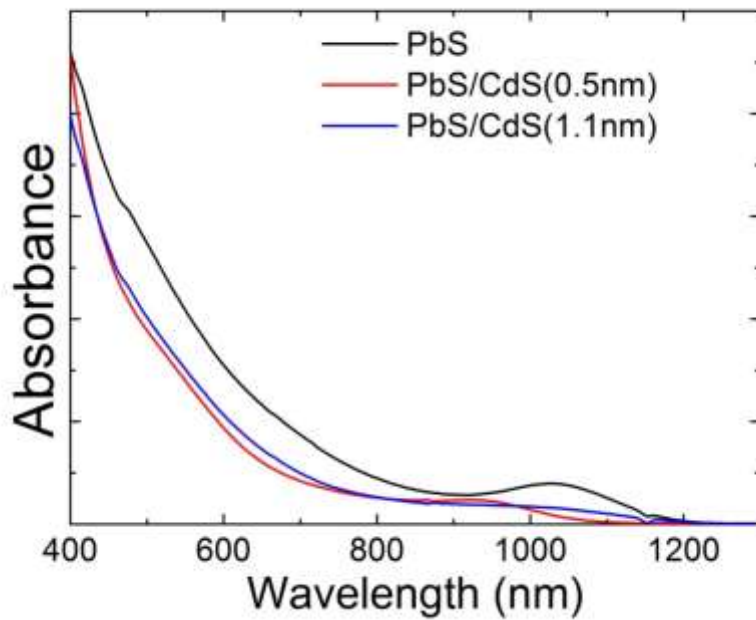

14

15 **Figure S2.** Absorbance of oleic-acid passivated colloidal QDs in chloroform.

16

17

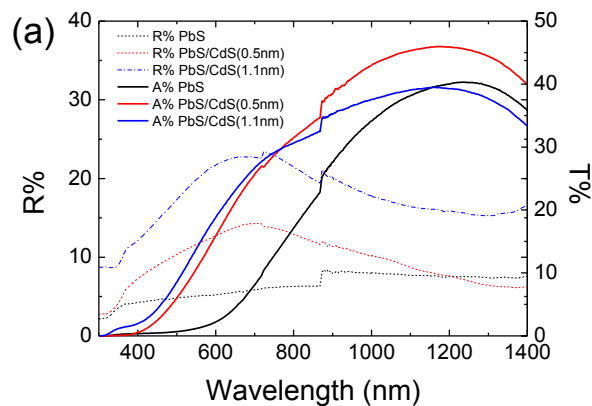

18

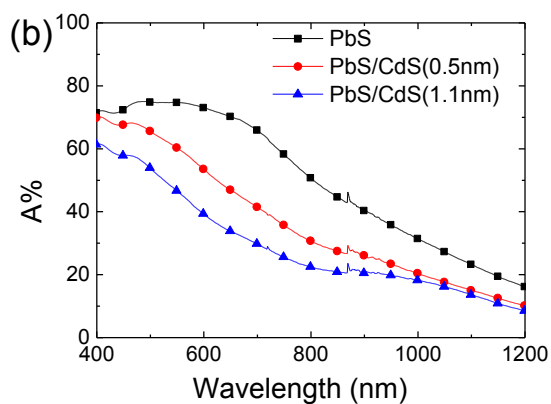

19

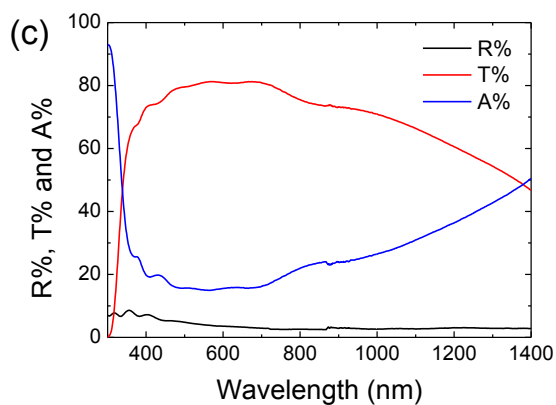

20

21 **Figure S3.** (a) Reflectance and transmittance of QD sensitized electrodes  
22 (Glass/FTO/TiO<sub>2</sub>/QDs) (b) Absorbance spectra of QD sensitized electrodes  
23 (TiO<sub>2</sub>/QDs) (c) Reflection, transmission and absorption of Glass/FTO substrate.

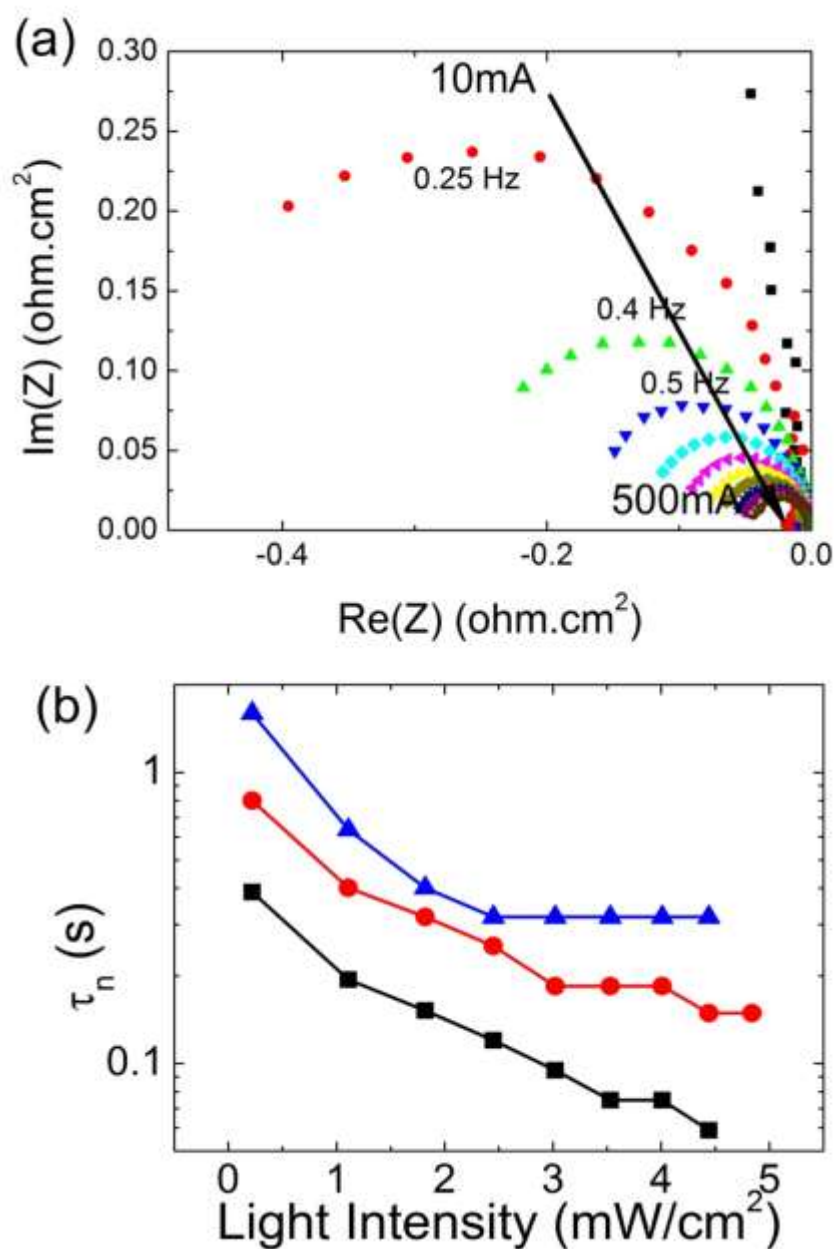

24  
25 **Figure S4.** (a) Nyquist plot of IMVS spectra of PbS/CdS(1.1nm) QD sensitized  
26 solar cells, measured by employing a 528 nm LED, scanned from 10 mA  
27 (corresponding to 0.22mW/cm<sup>2</sup> light intensity) to 500 mA (corresponding to 5.57  
28 mW/cm<sup>2</sup> light intensity). (b) Light intensity dependent mean electron lifetime  
29 determined by IMVS measured under 528 nm LED illumination.

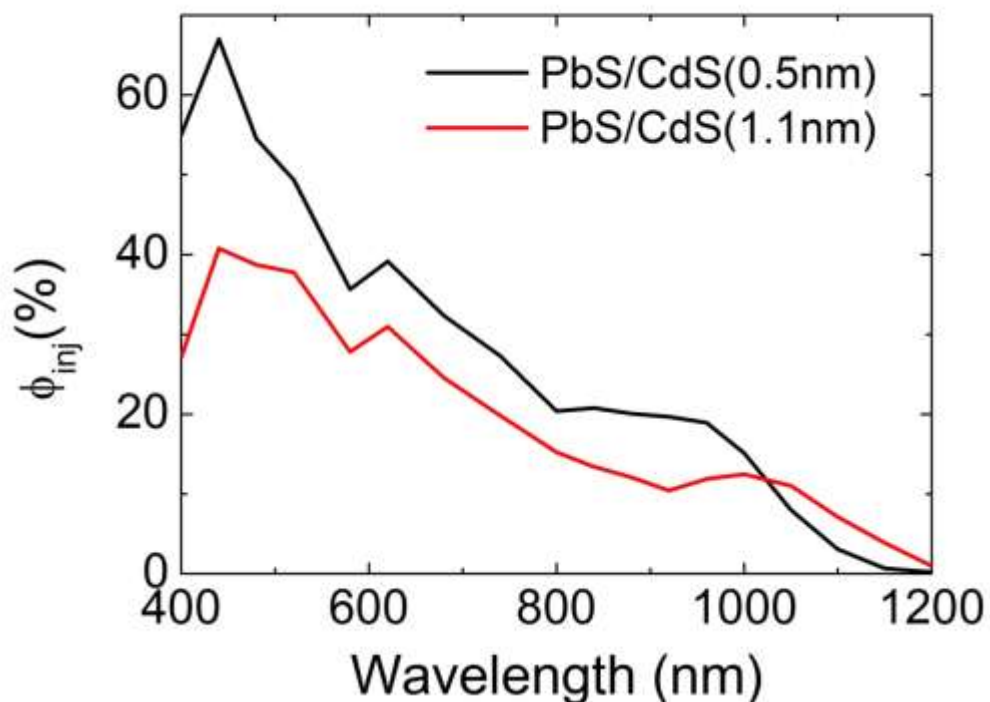

30

31 **Figure S5.** Charge injection efficiencies for cells with different CdS shell  
32 thicknesses. The charge injection efficiency is obtained by  $\phi_{inj} = IQE/\eta_c$ , where  
33 the  $\eta_c$  is measured at  $10 \text{ mW/cm}^2$  (Table S1) is used.

34

35

36 **Table S1.** Equivalent circuit fitting results and other parameters of cells <sup>a</sup>

| Light Intensity       | $C_{\mu}^b$              | $R_{ct}^c$              | $R_r^d$            | $\tau_n^e$ | $\tau_d^f$ | $D_e^g$     | $\mu_e^h$          | $L_d^i$ | $\eta_e^j$ |
|-----------------------|--------------------------|-------------------------|--------------------|------------|------------|-------------|--------------------|---------|------------|
| $mWcm^{-2}$           | $\mu Fcm^{-2}\mu m^{-1}$ | $\Omega cm^2\mu m^{-1}$ | $\Omega cm^2\mu m$ | ms         | ms         | $m^2s^{-1}$ | $cm^2V^{-1}s^{-1}$ | $\mu m$ | %          |
| <b>PbS</b>            |                          |                         |                    |            |            |             |                    |         |            |
| 100.0                 | 358.08                   | 32.19                   | 109.68             | 39.27      | 5.94E+02   | 2.69E-11    | 1.05E-05           | 1.0     | 31.7       |
| 91.2                  | 170.53                   | 31.38                   | 155.68             | 26.55      | 3.36E+02   | 4.76E-11    | 1.85E-05           | 1.1     | 34.2       |
| 79.4                  | 166.65                   | 38.34                   | 158.96             | 26.49      | 4.02E+02   | 3.98E-11    | 1.55E-05           | 1.0     | 31.7       |
| 50.1                  | 180.79                   | 63.98                   | 199.20             | 36.01      | 6.76E+02   | 2.37E-11    | 9.21E-06           | 0.9     | 29.0       |
| 31.6                  | 189.94                   | 103.13                  | 291.92             | 55.45      | 9.42E+02   | 1.70E-11    | 6.61E-06           | 1.0     | 31.7       |
| 10.0                  | 132.69                   | 161.50                  | 960.00             | 127.38     | 2.69E+03   | 5.94E-12    | 2.31E-06           | 0.9     | 29.0       |
| <b>PbS/CdS(0.5nm)</b> |                          |                         |                    |            |            |             |                    |         |            |
| 100.0                 | 315.79                   | 1.58                    | 130.00             | 41.05      | 4.90E+01   | 3.27E-10    | 1.27E-04           | 3.7     | 75.6       |
| 91.2                  | 316.45                   | 1.33                    | 139.00             | 43.99      | 3.86E+01   | 4.15E-10    | 1.62E-04           | 4.3     | 82.3       |
| 79.4                  | 314.59                   | 1.87                    | 208.00             | 65.43      | 4.55E+01   | 3.51E-10    | 1.37E-04           | 4.8     | 84.5       |
| 50.1                  | 361.82                   | 1.39                    | 155.00             | 56.08      | 7.21E+01   | 2.22E-10    | 8.64E-05           | 3.5     | 74.2       |
| 31.6                  | 356.04                   | 2.41                    | 292.00             | 103.96     | 8.36E+01   | 1.91E-10    | 7.45E-05           | 4.5     | 83.1       |
| 10.0                  | 367.23                   | 3.30                    | 610.00             | 224.01     | 1.10E+02   | 1.46E-10    | 5.68E-05           | 5.7     | 88.2       |
| <b>PbS/CdS(1.1nm)</b> |                          |                         |                    |            |            |             |                    |         |            |
| 100.0                 | 892.45                   | 0.26                    | 195.20             | 174.21     | 2.13E+01   | 7.50E-10    | 2.92E-04           | 11.4    | 96.6       |
| 91.2                  | 891.09                   | 0.38                    | 222.40             | 198.18     | 3.48E+01   | 4.60E-10    | 1.79E-04           | 9.5     | 95.2       |
| 79.4                  | 880.38                   | 0.42                    | 253.76             | 223.41     | 3.38E+01   | 4.74E-10    | 1.84E-04           | 10.3    | 95.9       |
| 50.1                  | 847.88                   | 0.45                    | 397.84             | 337.32     | 3.65E+01   | 4.38E-10    | 1.71E-04           | 12.2    | 97.0       |
| 31.6                  | 817.18                   | 0.51                    | 606.40             | 495.54     | 4.29E+01   | 3.73E-10    | 1.45E-04           | 13.6    | 97.6       |
| 10.0                  | 718.56                   | 0.56                    | 1312.80            | 943.32     | 4.28E+01   | 3.74E-10    | 1.45E-04           | 18.8    | 98.7       |

37 <sup>a</sup> values are determined based on the data measured at open-circuit condition under different light intensity by transmission line  
 38 model fitting as the equivalent circuit shown in Fig. 3a.

39 <sup>b</sup> the chemical capacitance per  $cm^2$  produced by the accumulation of electrons in the  $TiO_2$  and interface,  $C_{\mu}' (= c_{\mu}'L)$ , where L is  
 40 the thickness of the  $TiO_2$ .  $C_{\mu} = Q(2\pi f_p)^{\alpha-1}$ , where Q is constant phase element (CPE),  $\alpha$  is a constant, and  $f_p$  is the peak frequency  
 41 of Nyquist impedance plots.

42 <sup>c</sup> electron transport resistance,  $R_{ct}' (= r_{ct}'L)$

43 <sup>d</sup> interfacial charge recombination resistance,  $R_r' (= r_r'/L)$

44 <sup>e</sup> the average electron lifetime in TiO<sub>2</sub>,  $\tau_n = C'_\mu R'_r$

45 <sup>f</sup> the average electron transit time,  $\tau_d = L^2/D_e$

46 <sup>g</sup> electron diffusion coefficient,  $D_e = (r_r/r_{ct})L^2/(2\pi\tau_n)$

47 <sup>h</sup> electron mobility,  $\mu_e = D_e/k_B T$

48 <sup>i</sup> electron diffusion length,  $L_d = (\tau_n D_e)^{0.5}$

49 <sup>j</sup> charge collection efficiency<sup>S1-S3</sup>,  $\eta_c = \frac{(-L_d \alpha \cosh(\frac{L}{L_d}) + \sinh(\frac{L}{L_d}) + L_d \alpha e^{-\alpha L}) L_d \alpha}{(1 - e^{-\alpha L})(1 - L_d^2 \alpha^2) \cosh(\frac{L}{L_d})}$ , where  $\alpha$  is the extinction coefficient of quantum

50 dot-sensitized TiO<sub>2</sub> film. Here we assume the  $\alpha L$  equals to 1 for the calculation. Another well-adopted formula for the charge

51 collection efficiency is  $\eta_c = 1 - (\frac{L}{L_d})^2$ . However, it is only valid when the cell active layer is thin enough so that the

52 photo-generated electrons either immediately transport to the electrodes or recombine. In the case  $L=L_d$  results in  $\eta_c = 0$ ,  
53 indicating this formula obviously deviates the real situation of the quantum dot-sensitized solar cells.

54

55 Supplementary References

- 56 S1. J. Halme, P. Vahermaa, K. Miettunen and P. Lund, *Adv Mater*, 2010, **22**,  
57 E210-234.
- 58 S2. X. Dang, H. Yi, M. H. Ham, J. Qi, D. S. Yun, R. Ladewski, M. S. Strano, P. T.  
59 Hammond and A. M. Belcher, *Nature nanotechnology*, 2011, **6**, 377-384.
- 60 S3. L. Bertoluzzi, S. Ma, *Physical chemistry chemical physics : PCCP*, 2013, **15**,  
61 4283.
- 62
